# Supplementary material for: Empagliflozin, Health Status, and Quality of Life in Patients With Heart Failure and Preserved Ejection Fraction: The EMPEROR-Preserved Trial
Source: PubMed Central journal article supplement (PMC8763045; doi:10.1161/circulationaha.121.057812), 2021-11-15
Supplement: cir-145-184-s001.pdf [file cir-145-184-s001.pdf]

## **SUPPLEMENTAL MATERIALS**

### **Expanded Methods for Multiple Imputation and Correction of Ceiling effect for responder analysis**

#### **Handling of missing data: Multiple Imputation**

Patients who are alive at 32 weeks and have missing baseline or 32 week KCCQ assessments have their missing CSS imputed using the multiple imputation (MI) methodology as follows. Missing CSS values at baseline or at 32 weeks were imputed under the Missing at Random (MAR) assumption. The imputation was done using a predictive mean matching multiple imputation model and a method of Fully Conditional Specification as implemented in the SAS Procedure MI (FCS statement). The predictive mean matching method ensured that the imputed values remain in the permissible range of the CSS values.

For imputation of baseline CSS the imputation model included the continuous covariates age, baseline LVEF and EGFR at baseline and categorical covariates, sex, diabetes status at baseline and region.

The imputation model for values after baseline included the treatment group, age, baseline EGFR, baseline CSS value, week 12, LVEF at baseline, sex, diabetes status at baseline, region, and a categorical variable representing the number of HHF (0, 1,  $\geq 2$  events) in the interval from randomization to 12 week and in the interval from 12 to 32 weeks. Occurrences of HHF are determined based on the investigator reported potential HHF.

100 iterations were used for multiple imputation. For the point estimate of the N and % of patients with an endpoint the mean over all imputations is reported.

Analogue specifications have been used for 12 weeks, 52 weeks and the other summary scores TSS and OSS.

## **Responder analysis with correction for ceiling effect and handling of death**

Number and percentage of patients in each treatment group were summarized across the following categories:

5-point deterioration from baseline to 32 weeks in CSS vs no significant deterioration:

- Death prior to the 32 weeks assessment or change from baseline in CSS  $\leq$  -5 points, vs
- Change from baseline to 32 weeks in CSS  $>$  -5 points.

If patients had a baseline value of CSS  $\leq$  5 points, i.e., near the “floor”, they are defined as having a 5-point deterioration only if they had CSS  $\leq$  5 points at 32 weeks.

5-point improvement from baseline to 32 weeks in CSS vs no significant improvement:

- Change from baseline in CSS  $\geq$  5 points, vs
- Death prior to the 32 weeks assessment or change from baseline in CSS  $<$  5 points.

If patients had a baseline value of CSS  $\geq$  95 points, i.e. near the “ceiling”, they are defined as having a 5 point improvement only if they had CSS  $\geq$  95 points at 32 weeks.

10-point improvement from baseline to 32 weeks in CSS vs no significant improvement:

- Change from baseline in CSS  $\geq$  10 points, vs
- Death prior to the 32 weeks assessment or change from baseline in CSS  $<$  10 points.

If patients had a baseline value of CSS  $\geq$  90 points, they are defined as having a 10 point improvement only if they had CSS  $\geq$  90 points at 32 weeks.

15-point improvement from baseline to 32 weeks in CSS vs no significant improvement:

- Change from baseline in CSS  $\geq$  15 points, vs
- Death prior to the 32 weeks assessment or change from baseline in CSS  $<$  15 points.

If patients had a baseline value of CSS  $\geq 85$  points, they are defined as having a 10 point improvement only if they had CSS  $\geq 85$  points at 32 weeks.

The proportion of CSS responder categories were compared between treatment groups using a logistic regression model including treatment group, continuous covariates age, LVEF at baseline, EGFR at baseline and baseline CSS value, and categorical covariates sex, diabetes status at baseline and region. Multiple imputations were used to impute missing data. The observed number of and proportion of CSS responders, odds ratio between treatment groups and its 95% confidence interval and corresponding 2-sided p-value estimated from each imputed dataset were combined using Rubin's rule, and the combined results are presented.

**Supplemental Figure I:** Summary of the availability of Kansas City Cardiomyopathy Questionnaires scores at each time point for the empagliflozin and placebo group.

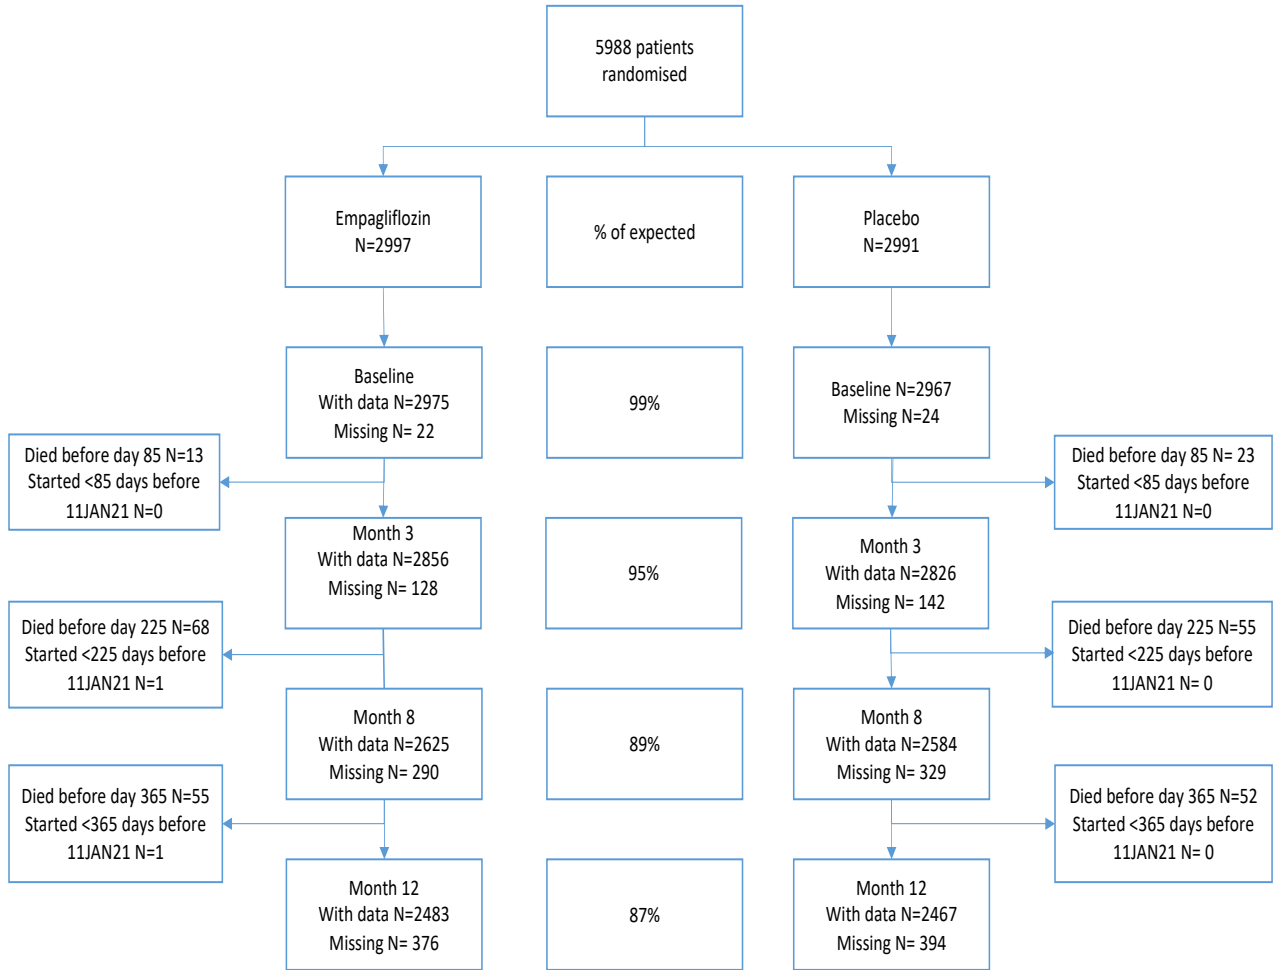

**Supplemental Figure II:** Cumulative incidence curves depicting effects of empagliflozin vs. placebo on time to first event of cardiovascular death or heart failure hospitalization according to baseline Kansas City Cardiomyopathy Questionnaires-clinical summary score

*Tertile 1*

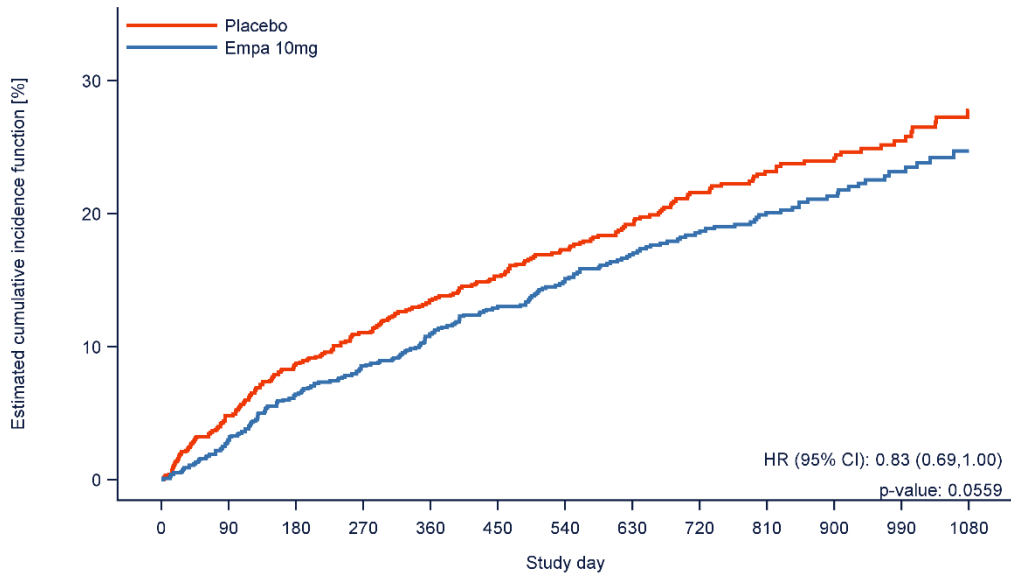

|           | Patients at risk |     |     |     |     |     |     |     |     |     |     |     |     |
|-----------|------------------|-----|-----|-----|-----|-----|-----|-----|-----|-----|-----|-----|-----|
| Placebo   | 955              | 903 | 860 | 832 | 806 | 747 | 621 | 544 | 458 | 386 | 302 | 210 | 124 |
| Empa 10mg | 1001             | 963 | 916 | 892 | 865 | 784 | 660 | 557 | 474 | 402 | 305 | 212 | 116 |

*Tertile 2*

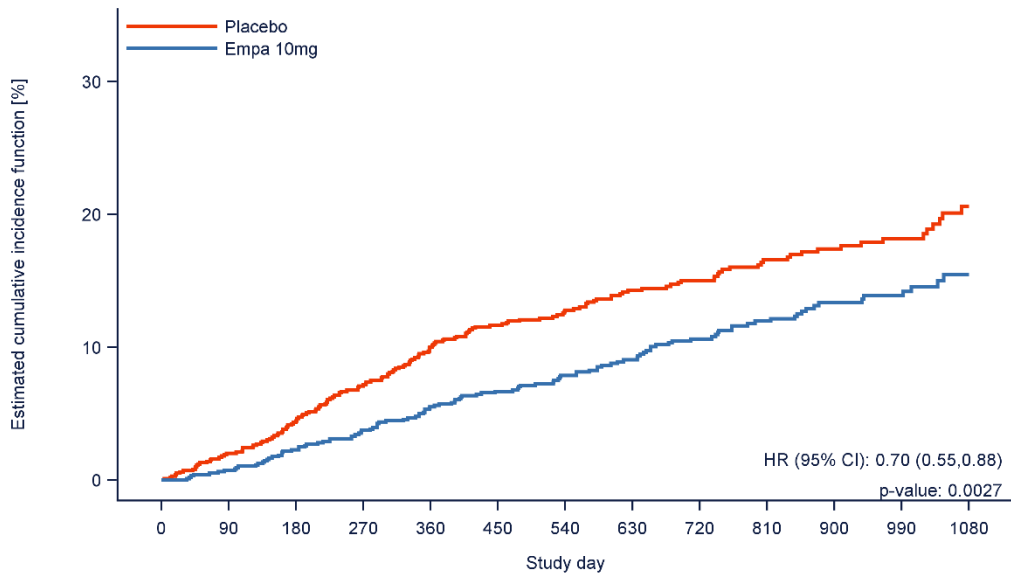

|           | Patients at risk |     |     |     |     |     |     |     |     |     |     |     |     |
|-----------|------------------|-----|-----|-----|-----|-----|-----|-----|-----|-----|-----|-----|-----|
| Placebo   | 997              | 968 | 937 | 908 | 874 | 809 | 711 | 616 | 507 | 424 | 322 | 234 | 138 |
| Empa 10mg | 970              | 956 | 933 | 912 | 892 | 821 | 710 | 629 | 540 | 461 | 348 | 242 | 132 |

Tertile 3

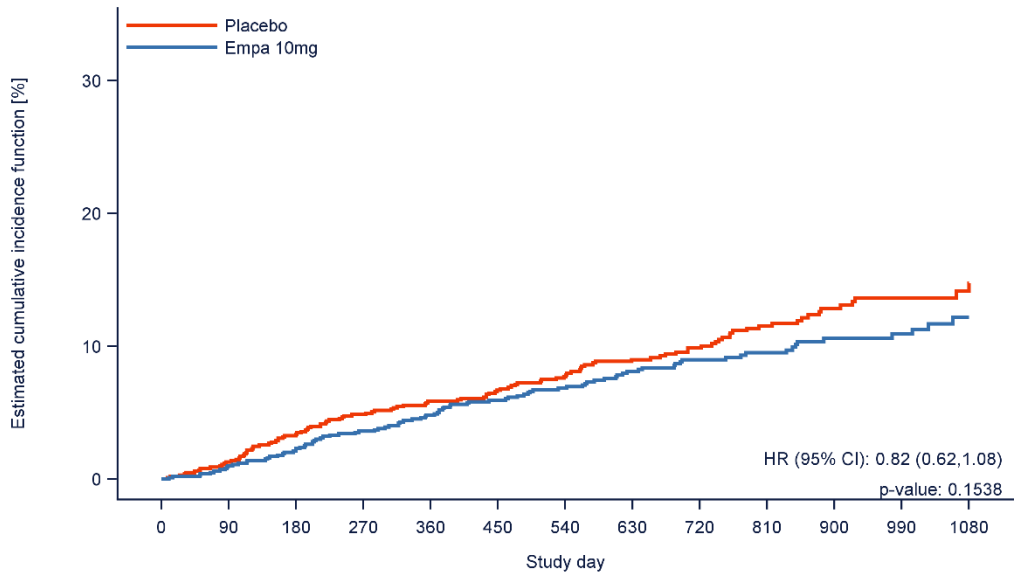

|           | Patients at risk |     |     |     |     |     |     |     |     |     |     |     |     |
|-----------|------------------|-----|-----|-----|-----|-----|-----|-----|-----|-----|-----|-----|-----|
| Placebo   | 1015             | 994 | 971 | 950 | 931 | 855 | 722 | 650 | 558 | 458 | 330 | 231 | 133 |
| Empa 10mg | 1004             | 988 | 974 | 956 | 931 | 866 | 748 | 658 | 550 | 455 | 341 | 247 | 149 |
